# Supplementary material for: Risks of Adverse Outcomes for Hospitalized COVID-19 Patients during the Four Waves in Brazil According to SARS-CoV-2 Variants, Age Group, and Vaccine Status
Source: MDPI journal article supplement (doi:10.3390/v15101997), 2023-09-26
Supplement: s1 [file viruses-2590740-supplementary.pdf › viruses-2590740-supplementary.pdf]

Table S1. Adjusted relative risks (aRR) for **in-hospital death** in COVID-19 patients hospitalized during variant/subvariants predominance relative to patients hospitalized during Ancestral lineage/B.1 (wave 1), Gamma/P.1 variant (wave 2), Omicron variant (wave 3) and Omicron BA.4/BA.5 subvariants (wave 4), stratified by age.

| Age group             | 18-39 |             |         | 40-59 |             |         | 60-79 |             |         | >=80 |             |         |
|-----------------------|-------|-------------|---------|-------|-------------|---------|-------|-------------|---------|------|-------------|---------|
| Covariate             | aRR   | CI 95%      | p value | aRR   | CI 95%      | p value | aRR   | CI 95%      | p value | aRR  | CI 95%      | p value |
| Male                  | 1.09  | (1.05-1.13) | <0.001  | 1.07  | (1.06-1.09) | <0.001  | 1.13  | (1.12-1.14) | <0.001  | 1.11 | (1.10-1.13) | <0.001  |
| Cardiac disease       | 1.29  | (1.22-1.35) | <0.001  | 1.19  | (1.17-1.21) | <0.001  | 1.07  | (1.06-1.08) | <0.001  | 1.01 | (1.00-1.02) | 0.059   |
| Hematological disease | 1.19  | (0.95-1.49) | 0.128   | 1.05  | (0.96-1.15) | 0.283   | 1.11  | (1.07-1.16) | <0.001  | 1.05 | (0.99-1.11) | 0.124   |
| Down's syndrome       | 1.89  | (1.61-2.21) | <0.001  | 1.37  | (1.20-1.55) | <0.001  | 0.88  | (0.78-0.99) | 0.027   | 0.84 | (0.72-1.00) | 0.044   |
| Liver disease         | 1.15  | (0.89-1.49) | 0.297   | 1.53  | (1.45-1.62) | <0.001  | 1.26  | (1.22-1.31) | <0.001  | 1.14 | (1.08-1.21) | <0.001  |
| Asthma                | 0.92  | (0.83-1.01) | 0.076   | 0.94  | (0.89-0.98) | 0.007   | 0.90  | (0.88-0.93) | <0.001  | 0.91 | (0.87-0.95) | <0.001  |
| Diabetes              | 1.44  | (1.36-1.52) | <0.001  | 1.28  | (1.26-1.30) | <0.001  | 1.10  | (1.09-1.11) | <0.001  | 1.02 | (1.01-1.03) | <0.005  |
| Neurological disease  | 1.69  | (1.52-1.88) | <0.001  | 1.42  | (1.36-1.49) | <0.001  | 1.26  | (1.24-1.29) | <0.001  | 1.14 | (1.13-1.16) | <0.001  |
| Pulmonary disease     | 1.05  | (0.88-1.27) | 0.579   | 1.35  | (1.29-1.42) | <0.001  | 1.23  | (1.21-1.25) | <0.001  | 1.13 | (1.11-1.15) | <0.001  |

|                          |      |             |        |      |             |        |      |             |        |      |             |        |
|--------------------------|------|-------------|--------|------|-------------|--------|------|-------------|--------|------|-------------|--------|
| <b>Immunosuppression</b> | 2.23 | (2.06-2.41) | <0.001 | 1.60 | (1.54-1.66) | <0.001 | 1.27 | (1.24-1.30) | <0.001 | 1.11 | (1.07-1.14) | <0.001 |
| <b>Kidney disease</b>    | 1.61 | (1.46-1.78) | <0.001 | 1.65 | (1.60-1.70) | <0.001 | 1.31 | (1.29-1.33) | <0.001 | 1.18 | (1.15-1.20) | <0.001 |
| <b>Obesity</b>           | 1.99 | (1.92-2.07) | <0.001 | 1.47 | (1.44-1.50) | <0.001 | 1.18 | (1.17-1.20) | <0.001 | 1.07 | (1.04-1.10) | <0.001 |
| <b>Other comorbidity</b> | 1.58 | (1.53-1.65) | <0.001 | 1.32 | (1.30-1.34) | <0.001 | 1.13 | (1.12-1.14) | <0.001 | 1.07 | (1.06-1.08) | <0.001 |
| <b>Fully vaccinated</b>  | 0.80 | (0.71-0.90) | <0.001 | 0.85 | (0.81-0.90) | <0.001 | 0.97 | (0.95-1.00) | 0.035  | 0.99 | (0.97-1.01) | 0.332  |
| <b>Booster</b>           | 0.65 | (0.52-0.82) | <0.001 | 0.72 | (0.66-0.80) | <0.001 | 0.91 | (0.88-0.95) | <0.001 | 0.89 | (0.86-0.92) | <0.001 |
| <b>Wave 2</b>            | 1.70 | (1.63-1.77) | <0.001 | 1.47 | (1.45-1.50) | <0.001 | 1.19 | (1.18-1.20) | <0.001 | 1.07 | (1.06-1.09) | <0.001 |
| <b>Wave 3</b>            | 1.15 | (1.04-1.26) | <0.005 | 1.28 | (1.22-1.33) | <0.001 | 0.92 | (0.90-0.94) | <0.001 | 0.84 | (0.82-0.86) | <0.001 |
| <b>Wave 4</b>            | 1.16 | (1.00-1.34) | 0.055  | 1.22 | (1.13-1.32) | <0.001 | 0.74 | (0.71-0.77) | <0.001 | 0.63 | (0.61-0.66) | <0.001 |
| <b>South</b>             | 0.90 | (0.86-0.94) | <0.001 | 0.97 | (0.95-0.98) | <0.001 | 0.99 | (0.98-1.01) | 0.338  | 1.01 | (0.99-1.03) | 0.216  |
| <b>North</b>             | 1.51 | (1.41-1.62) | <0.001 | 1.45 | (1.40-1.50) | <0.001 | 1.29 | (1.26-1.32) | <0.001 | 1.14 | (1.11-1.17) | <0.001 |
| <b>Northeast</b>         | 1.42 | (1.36-1.49) | <0.001 | 1.28 | (1.26-1.31) | <0.001 | 1.17 | (1.16-1.19) | <0.001 | 1.12 | (1.10-1.14) | <0.001 |
| <b>Midwest</b>           | 1.12 | (1.06-1.18) | <0.001 | 1.08 | (1.06-1.11) | <0.001 | 1.04 | (1.03-1.06) | <0.001 | 1.01 | (0.99-1.03) | 0.467  |

Table S2. Adjusted relative risks (aRR) for **invasive mechanical ventilation (IMV)** need in COVID-19 patients hospitalized during variant/subvariants predominance relative to patients hospitalized during Ancestral lineage/B.1 (wave 1), Gamma/P.1 variant (wave 2), Omicron variant (wave 3) and Omicron BA.4/BA.5 subvariants (wave 4), stratified by age.

| Age group             | 18-39 |             |         | 40-59 |             |         | 60-79 |             |         | >=80 |             |         |
|-----------------------|-------|-------------|---------|-------|-------------|---------|-------|-------------|---------|------|-------------|---------|
| Covariate             | aRR   | CI 95%      | p value | aRR   | CI 95%      | p value | aRR   | CI 95%      | p value | aRR  | CI 95%      | p value |
| Male                  | 1.06  | (1.03-1.10) | <0.005  | 1.06  | (1.04-1.08) | <0.001  | 1.10  | (1.08-1.12) | <0.001  | 1.21 | (1.18-1.24) | <0.001  |
| Cardiac disease       | 1.20  | (1.14-1.27) | <0.001  | 1.18  | (1.16-1.20) | <0.001  | 1.11  | (1.10-1.13) | <0.001  | 1.11 | (1.08-1.14) | <0.001  |
| Hematological disease | 1.04  | (0.83-1.31) | 0.749   | 1.06  | (0.95-1.18) | 0.326   | 1.09  | (1.01-1.17) | 0.020   | 0.96 | (0.83-1.10) | 0.536   |
| Down's syndrome       | 1.85  | (1.59-2.16) | <0.001  | 1.40  | (1.22-1.60) | <0.001  | 0.85  | (0.71-1.01) | 0.062   | 0.95 | (0.69-1.30) | 0.734   |
| Liver disease         | 1.15  | (0.90-1.48) | 0.262   | 1.36  | (1.26-1.47) | <0.001  | 1.19  | (1.13-1.26) | <0.001  | 1.24 | (1.08-1.41) | <0.005  |
| Asthma                | 1.00  | (0.92-1.10) | 0.953   | 1.01  | (0.96-1.07) | 0.620   | 0.96  | (0.91-1.00) | 0.049   | 0.97 | (0.89-1.06) | 0.499   |
| Diabetes              | 1.37  | (1.29-1.45) | <0.001  | 1.21  | (1.18-1.23) | <0.001  | 1.08  | (1.07-1.10) | <0.001  | 1.08 | (1.05-1.11) | <0.001  |
| Neurological disease  | 1.72  | (1.55-1.91) | <0.001  | 1.36  | (1.28-1.43) | <0.001  | 1.08  | (1.05-1.12) | <0.001  | 0.89 | (0.86-0.93) | <0.001  |
| Pulmonary disease     | 1.08  | (0.91-1.28) | 0.383   | 1.24  | (1.17-1.32) | <0.001  | 1.26  | (1.22-1.29) | <0.001  | 1.15 | (1.10-1.21) | <0.001  |

|                          |      |             |        |      |             |        |      |             |        |      |             |        |
|--------------------------|------|-------------|--------|------|-------------|--------|------|-------------|--------|------|-------------|--------|
| <b>Immunosuppression</b> | 1.55 | (1.41-1.70) | <0.001 | 1.27 | (1.21-1.34) | <0.001 | 1.08 | (1.04-1.12) | <0.001 | 1.00 | (0.92-1.08) | 0.968  |
| <b>Kidney disease</b>    | 1.53 | (1.38-1.70) | <0.001 | 1.44 | (1.39-1.51) | <0.001 | 1.25 | (1.22-1.28) | <0.001 | 1.20 | (1.15-1.26) | <0.001 |
| <b>Obesity</b>           | 2.00 | (1.93-2.08) | <0.001 | 1.69 | (1.65-1.72) | <0.001 | 1.44 | (1.41-1.47) | <0.001 | 1.38 | (1.30-1.46) | <0.001 |
| <b>Other comorbidity</b> | 1.43 | (1.37-1.49) | <0.001 | 1.26 | (1.24-1.29) | <0.001 | 1.15 | (1.13-1.17) | <0.001 | 1.08 | (1.05-1.11) | <0.001 |
| <b>Fully vaccinated</b>  | 0.81 | (0.71-0.91) | <0.005 | 0.87 | (0.81-0.93) | <0.001 | 0.93 | (0.89-0.96) | <0.001 | 0.94 | (0.89-0.99) | 0.015  |
| <b>Booster</b>           | 0.70 | (0.55-0.89) | <0.005 | 0.76 | (0.67-0.87) | <0.001 | 0.90 | (0.85-0.96) | <0.005 | 0.92 | (0.85-0.99) | 0.032  |
| <b>Wave 2</b>            | 1.42 | (1.36-1.48) | <0.001 | 1.36 | (1.33-1.39) | <0.001 | 1.14 | (1.13-1.16) | <0.001 | 1.01 | (0.98-1.04) | 0.519  |
| <b>Wave 3</b>            | 0.98 | (0.89-1.08) | 0.702  | 1.14 | (1.08-1.21) | <0.001 | 0.91 | (0.87-0.94) | <0.001 | 0.75 | (0.71-0.78) | <0.001 |
| <b>Wave 4</b>            | 1.04 | (0.89-1.22) | 0.614  | 1.12 | (1.02-1.24) | 0.022  | 0.72 | (0.68-0.77) | <0.001 | 0.59 | (0.54-0.64) | <0.001 |
| <b>South</b>             | 1.19 | (1.14-1.25) | <0.001 | 1.25 | (1.23-1.28) | <0.001 | 1.23 | (1.20-1.25) | <0.001 | 1.07 | (1.03-1.11) | <0.001 |
| <b>North</b>             | 1.37 | (1.26-1.49) | <0.001 | 1.44 | (1.38-1.51) | <0.001 | 1.40 | (1.35-1.45) | <0.001 | 1.58 | (1.48-1.68) | <0.001 |
| <b>Northeast</b>         | 1.42 | (1.36-1.50) | <0.001 | 1.38 | (1.34-1.42) | <0.001 | 1.43 | (1.40-1.46) | <0.001 | 1.58 | (1.53-1.63) | <0.001 |
| <b>Midwest</b>           | 1.22 | (1.16-1.29) | <0.001 | 1.22 | (1.18-1.25) | <0.001 | 1.27 | (1.24-1.30) | <0.001 | 1.47 | (1.41-1.54) | <0.001 |

Table S3. Adjusted relative risks (aRR) for **non-invasive ventilation (NIV)** need in COVID-19 patients hospitalized during variant/subvariants predominance relative to patients hospitalized during Ancestral lineage/B.1 (wave 1), Gamma/P.1 variant (wave 2), Omicron variant (wave 3) and Omicron BA.4/BA.5 subvariants (wave 4), stratified by age.

| Age group             | 18-39 |             |         | 40-59 |             |         | 60-79 |             |         | >=80 |             |         |
|-----------------------|-------|-------------|---------|-------|-------------|---------|-------|-------------|---------|------|-------------|---------|
| Covariate             | aRR   | CI 95%      | p value | aRR   | CI 95%      | p value | aRR   | CI 95%      | p value | aRR  | CI 95%      | p value |
| Male                  | 1.15  | (1.14-1.17) | <0.001  | 1.01  | (1.01-1.02) | <0.005  | 0.96  | (0.95-0.97) | <0.001  | 0.94 | (0.93-0.95) | <0.001  |
| Cardiac disease       | 1.05  | (1.03-1.07) | <0.001  | 1.03  | (1.02-1.03) | <0.001  | 1.01  | (1.00-1.01) | 0.081   | 1.02 | (1.01-1.03) | <0.005  |
| Hematological disease | 0.94  | (0.85-1.04) | 0.250   | 0.91  | (0.86-0.97) | <0.005  | 0.96  | (0.92-1.00) | 0.053   | 1.00 | (0.95-1.07) | 0.904   |
| Down's syndrome       | 0.91  | (0.83-1.00) | 0.060   | 0.93  | (0.86-1.01) | 0.097   | 1.03  | (0.94-1.13) | 0.497   | 0.84 | (0.70-1.01) | 0.057   |
| Liver disease         | 0.88  | (0.78-1.00) | 0.042   | 0.83  | (0.79-0.87) | <0.001  | 0.90  | (0.86-0.93) | <0.001  | 0.89 | (0.83-0.96) | <0.005  |
| Asthma                | 1.05  | (1.02-1.09) | <0.005  | 1.03  | (1.01-1.06) | <0.005  | 1.03  | (1.00-1.05) | 0.030   | 1.02 | (0.99-1.06) | 0.225   |
| Diabetes              | 1.01  | (0.98-1.04) | 0.557   | 0.99  | (0.98-1.00) | 0.233   | 1.00  | (0.99-1.00) | 0.300   | 0.99 | (0.98-1.00) | 0.118   |
| Neurological disease  | 1.01  | (0.96-1.07) | 0.639   | 0.96  | (0.93-1.00) | 0.026   | 1.02  | (1.00-1.03) | 0.080   | 1.08 | (1.07-1.10) | <0.001  |
| Pulmonary disease     | 1.14  | (1.07-1.22) | <0.001  | 1.04  | (1.00-1.07) | 0.025   | 1.01  | (1.00-1.03) | 0.174   | 1.04 | (1.02-1.06) | <0.001  |

|                          |      |             |        |      |             |        |      |             |        |      |             |        |
|--------------------------|------|-------------|--------|------|-------------|--------|------|-------------|--------|------|-------------|--------|
| <b>Immunosuppression</b> | 0.92 | (0.87-0.97) | <0.005 | 0.92 | (0.89-0.94) | <0.001 | 0.94 | (0.92-0.97) | <0.001 | 0.99 | (0.96-1.03) | 0.583  |
| <b>Kidney disease</b>    | 0.87 | (0.82-0.93) | <0.001 | 0.87 | (0.84-0.89) | <0.001 | 0.88 | (0.86-0.90) | <0.001 | 0.93 | (0.91-0.95) | <0.001 |
| <b>Obesity</b>           | 1.00 | (0.98-1.02) | 0.970  | 0.90 | (0.89-0.91) | <0.001 | 0.88 | (0.87-0.89) | <0.001 | 0.92 | (0.89-0.95) | <0.001 |
| <b>Other comorbidity</b> | 0.93 | (0.92-0.95) | <0.001 | 0.96 | (0.95-0.97) | <0.001 | 0.97 | (0.96-0.98) | <0.001 | 1.02 | (1.01-1.03) | <0.005 |
| <b>Fully vaccinated</b>  | 0.92 | (0.87-0.97) | 0.005  | 0.97 | (0.93-1.00) | 0.046  | 1.00 | (0.98-1.03) | 0.645  | 1.02 | (1.00-1.04) | 0.047  |
| <b>Booster</b>           | 0.91 | (0.81-1.02) | 0.105  | 0.92 | (0.87-0.98) | 0.008  | 0.98 | (0.96-1.01) | 0.211  | 1.00 | (0.97-1.02) | 0.750  |
| <b>Wave 2</b>            | 1.32 | (1.30-1.34) | <0.001 | 1.17 | (1.16-1.18) | <0.001 | 1.12 | (1.11-1.13) | <0.001 | 1.11 | (1.09-1.12) | <0.001 |
| <b>Wave 3</b>            | 0.76 | (0.73-0.80) | <0.001 | 0.93 | (0.91-0.96) | <0.001 | 1.03 | (1.01-1.05) | <0.005 | 1.08 | (1.06-1.10) | <0.001 |
| <b>Wave 4</b>            | 0.69 | (0.63-0.75) | <0.001 | 0.81 | (0.77-0.85) | <0.001 | 0.98 | (0.95-1.01) | 0.225  | 1.02 | (0.99-1.04) | 0.258  |
| <b>South</b>             | 0.99 | (0.97-1.00) | 0.084  | 0.96 | (0.95-0.97) | <0.001 | 0.93 | (0.92-0.94) | <0.001 | 1.00 | (0.99-1.02) | 0.621  |
| <b>North</b>             | 0.92 | (0.89-0.95) | <0.001 | 0.88 | (0.86-0.90) | <0.001 | 0.81 | (0.79-0.83) | <0.001 | 0.82 | (0.79-0.85) | <0.001 |
| <b>Northeast</b>         | 0.89 | (0.87-0.91) | <0.001 | 0.91 | (0.90-0.92) | <0.001 | 0.84 | (0.83-0.85) | <0.001 | 0.86 | (0.84-0.87) | <0.001 |
| <b>Midwest</b>           | 0.92 | (0.90-0.94) | <0.001 | 0.90 | (0.89-0.91) | <0.001 | 0.85 | (0.84-0.86) | <0.001 | 0.81 | (0.79-0.83) | <0.001 |

Table S4. Adjusted relative risks (aRR) for **intensive care unit (ICU)** admission in COVID-19 patients hospitalized during variant/subvariants predominance relative to patients hospitalized during Ancestral lineage/B.1 (wave 1), Gamma/P.1 variant (wave 2), Omicron variant (wave 3) and Omicron BA.4/BA.5 subvariants (wave 4), stratified by age.

| Age group             | 18-39 |             |         | 40-59 |             |         | 60-79 |             |         | >=80 |             |         |
|-----------------------|-------|-------------|---------|-------|-------------|---------|-------|-------------|---------|------|-------------|---------|
| Covariate             | aRR   | CI 95%      | p value | aRR   | CI 95%      | p value | aRR   | CI 95%      | p value | aRR  | CI 95%      | p value |
| Male                  | 1.11  | (1.08-1.13) | <0.001  | 1.12  | (1.11-1.13) | <0.001  | 1.10  | (1.09-1.11) | <0.001  | 1.12 | (1.11-1.14) | <0.001  |
| Cardiac disease       | 1.17  | (1.13-1.21) | <0.001  | 1.15  | (1.14-1.17) | <0.001  | 1.12  | (1.11-1.13) | <0.001  | 1.12 | (1.10-1.14) | <0.001  |
| Hematological disease | 1.00  | (0.87-1.14) | 0.954   | 1.07  | (1.00-1.15) | 0.062   | 1.11  | (1.06-1.17) | <0.001  | 1.01 | (0.93-1.11) | 0.796   |
| Down's syndrome       | 1.44  | (1.30-1.60) | <0.001  | 1.20  | (1.09-1.32) | <0.001  | 1.00  | (0.89-1.12) | 0.989   | 0.77 | (0.60-0.99) | 0.045   |
| Liver disease         | 1.09  | (0.94-1.27) | 0.249   | 1.14  | (1.09-1.21) | <0.001  | 1.07  | (1.03-1.12) | <0.005  | 1.08 | (0.99-1.18) | 0.078   |
| Asthma                | 1.10  | (1.04-1.15) | <0.005  | 1.02  | (0.98-1.06) | 0.293   | 0.96  | (0.93-0.99) | 0.007   | 1.04 | (0.98-1.10) | 0.188   |
| Diabetes              | 1.26  | (1.22-1.31) | <0.001  | 1.13  | (1.11-1.14) | <0.001  | 1.05  | (1.04-1.06) | <0.001  | 1.07 | (1.05-1.09) | <0.001  |
| Neurological disease  | 1.35  | (1.26-1.44) | <0.001  | 1.20  | (1.15-1.24) | <0.001  | 1.02  | (1.00-1.04) | 0.122   | 0.96 | (0.93-0.98) | <0.005  |
| Pulmonary disease     | 1.09  | (0.98-1.20) | 0.104   | 1.14  | (1.10-1.19) | <0.001  | 1.16  | (1.14-1.18) | <0.001  | 1.11 | (1.08-1.15) | <0.001  |

|                          |      |             |        |      |             |        |      |             |        |      |             |        |
|--------------------------|------|-------------|--------|------|-------------|--------|------|-------------|--------|------|-------------|--------|
| <b>Immunosuppression</b> | 1.22 | (1.15-1.30) | <0.001 | 1.12 | (1.08-1.16) | <0.001 | 1.04 | (1.01-1.06) | 0.011  | 1.03 | (0.98-1.09) | 0.213  |
| <b>Kidney disease</b>    | 1.43 | (1.34-1.52) | <0.001 | 1.32 | (1.29-1.36) | <0.001 | 1.22 | (1.20-1.24) | <0.001 | 1.16 | (1.13-1.20) | <0.001 |
| <b>Obesity</b>           | 1.65 | (1.61-1.69) | <0.001 | 1.49 | (1.47-1.51) | <0.001 | 1.34 | (1.32-1.36) | <0.001 | 1.23 | (1.18-1.28) | <0.001 |
| <b>Other comorbidity</b> | 1.28 | (1.25-1.31) | <0.001 | 1.22 | (1.20-1.23) | <0.001 | 1.16 | (1.15-1.18) | <0.001 | 1.13 | (1.11-1.15) | <0.001 |
| <b>Fully vaccinated</b>  | 0.96 | (0.90-1.03) | 0.264  | 0.99 | (0.95-1.04) | 0.805  | 0.96 | (0.93-0.98) | <0.005 | 0.99 | (0.96-1.03) | 0.742  |
| <b>Booster</b>           | 1.07 | (0.95-1.21) | 0.275  | 0.95 | (0.88-1.02) | 0.132  | 1.00 | (0.96-1.03) | 0.808  | 1.04 | (0.99-1.08) | 0.101  |
| <b>Wave 2</b>            | 1.13 | (1.10-1.16) | <0.001 | 1.09 | (1.07-1.10) | <0.001 | 0.99 | (0.98-1.00) | 0.043  | 0.87 | (0.85-0.88) | <0.001 |
| <b>Wave 3</b>            | 1.00 | (0.94-1.06) | 0.951  | 1.09 | (1.05-1.13) | <0.001 | 0.97 | (0.94-0.99) | <0.005 | 0.85 | (0.82-0.88) | <0.001 |
| <b>Wave 4</b>            | 0.96 | (0.87-1.05) | 0.349  | 1.03 | (0.97-1.10) | 0.308  | 0.82 | (0.79-0.85) | <0.001 | 0.73 | (0.70-0.76) | <0.001 |
| <b>South</b>             | 0.88 | (0.86-0.91) | <0.001 | 0.95 | (0.93-0.96) | <0.001 | 0.96 | (0.94-0.97) | <0.001 | 0.80 | (0.78-0.82) | <0.001 |
| <b>North</b>             | 0.77 | (0.72-0.83) | <0.001 | 0.91 | (0.88-0.95) | <0.001 | 0.95 | (0.92-0.98) | <0.005 | 0.93 | (0.88-0.98) | 0.008  |
| <b>Northeast</b>         | 1.12 | (1.08-1.15) | <0.001 | 1.16 | (1.14-1.18) | <0.001 | 1.20 | (1.19-1.22) | <0.001 | 1.24 | (1.21-1.26) | <0.001 |
| <b>Midwest</b>           | 0.99 | (0.96-1.03) | 0.585  | 1.04 | (1.02-1.06) | <0.001 | 1.09 | (1.08-1.11) | <0.001 | 1.21 | (1.18-1.24) | <0.001 |
